# Supplementary material
Source: MDPI journal article supplement (https://www.mdpi.com/2075-163X/9/5/311)
Supplement: s1 [file s1]

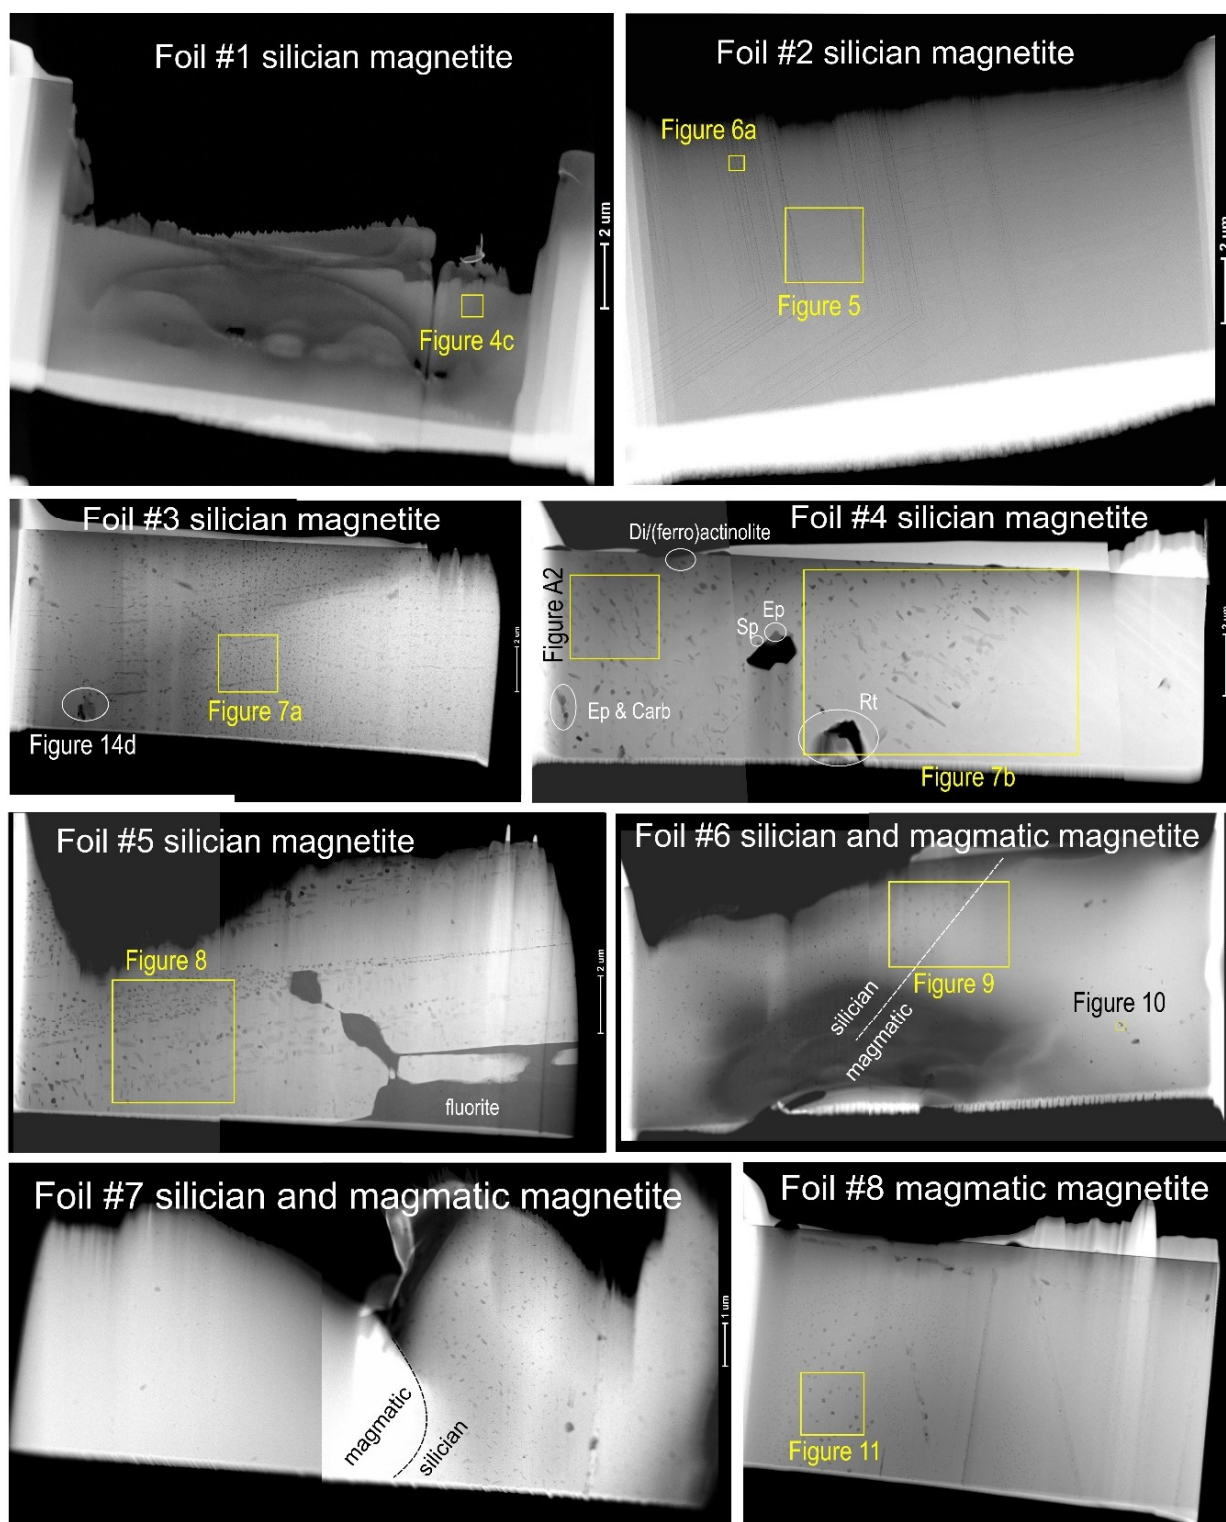

**Figure S1.** HAADF STEM images showing the 8 foils (Table 1) analysed in this study and the location of element maps as marked. Location for STEM EDS maps are also marked. Abbreviations: Carb-carbonate; Di-diopside; Ep-epidote; Rt-rutile.



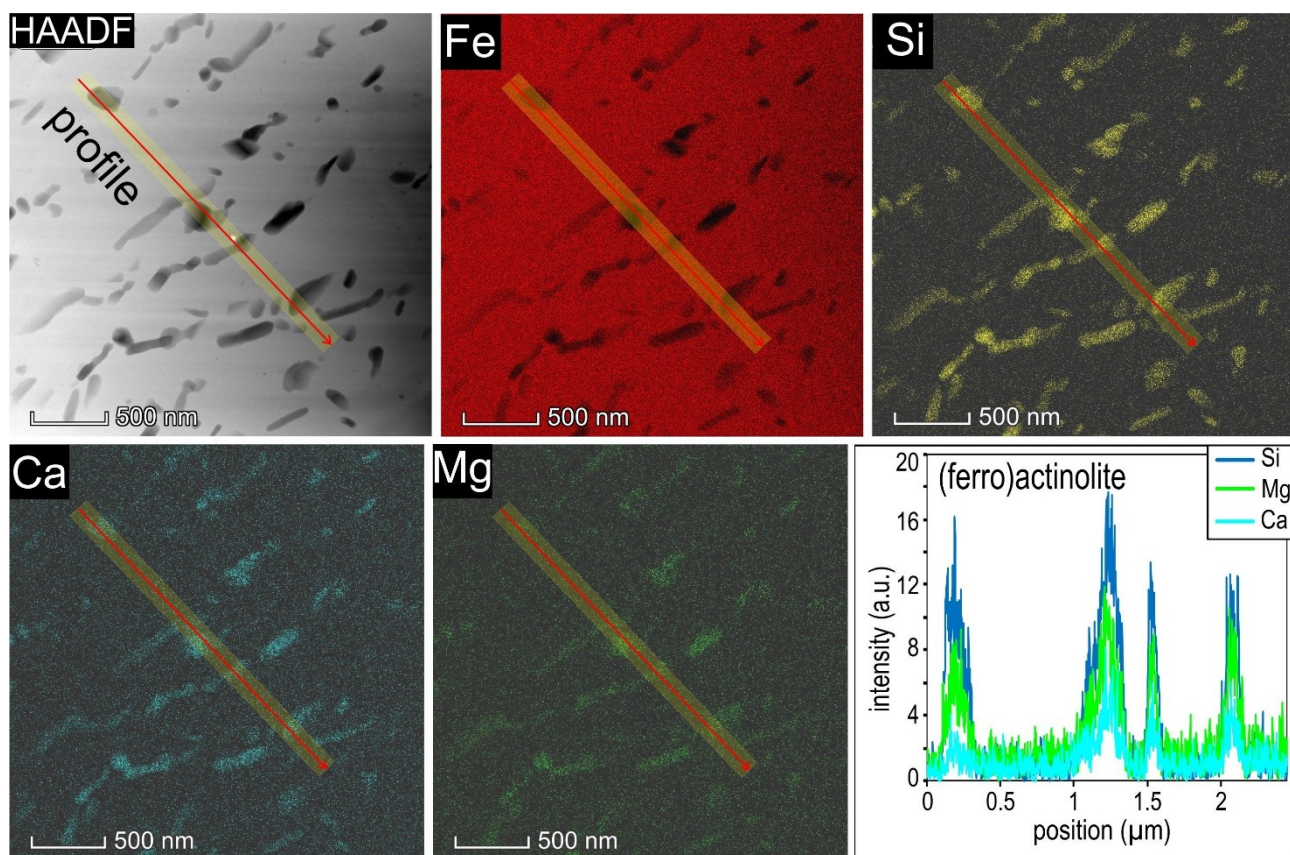

**Figure S2.** HAADF STEM image, EDS maps and profile showing calc-silicate inclusions in magnetite (foil #4).

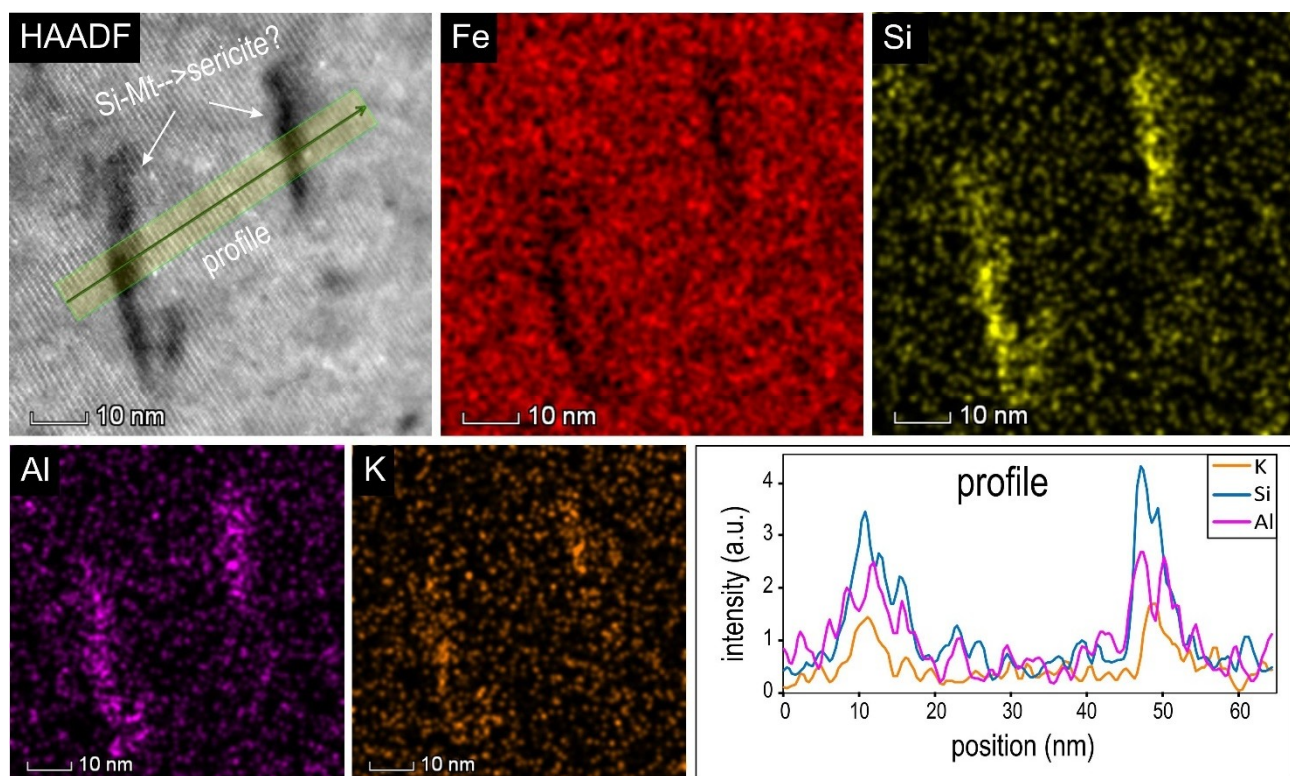

**Figure S3.** HAADF STEM image, EDS maps and profile showing Al- and K-bearing Si-Fe-nanoprecipitates (Si-Mt) in magnetite (foil #5)



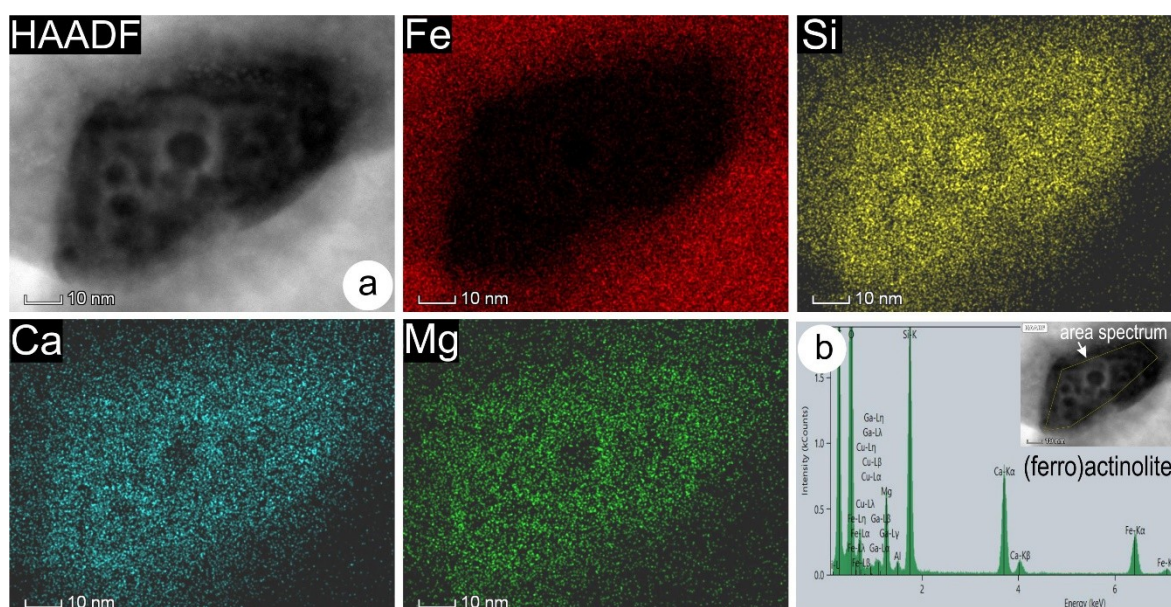

**Figure S4.** HAADF STEM image, EDS maps and spectrum showing (ferro)actinolite inclusion in magnetite (foil #4).

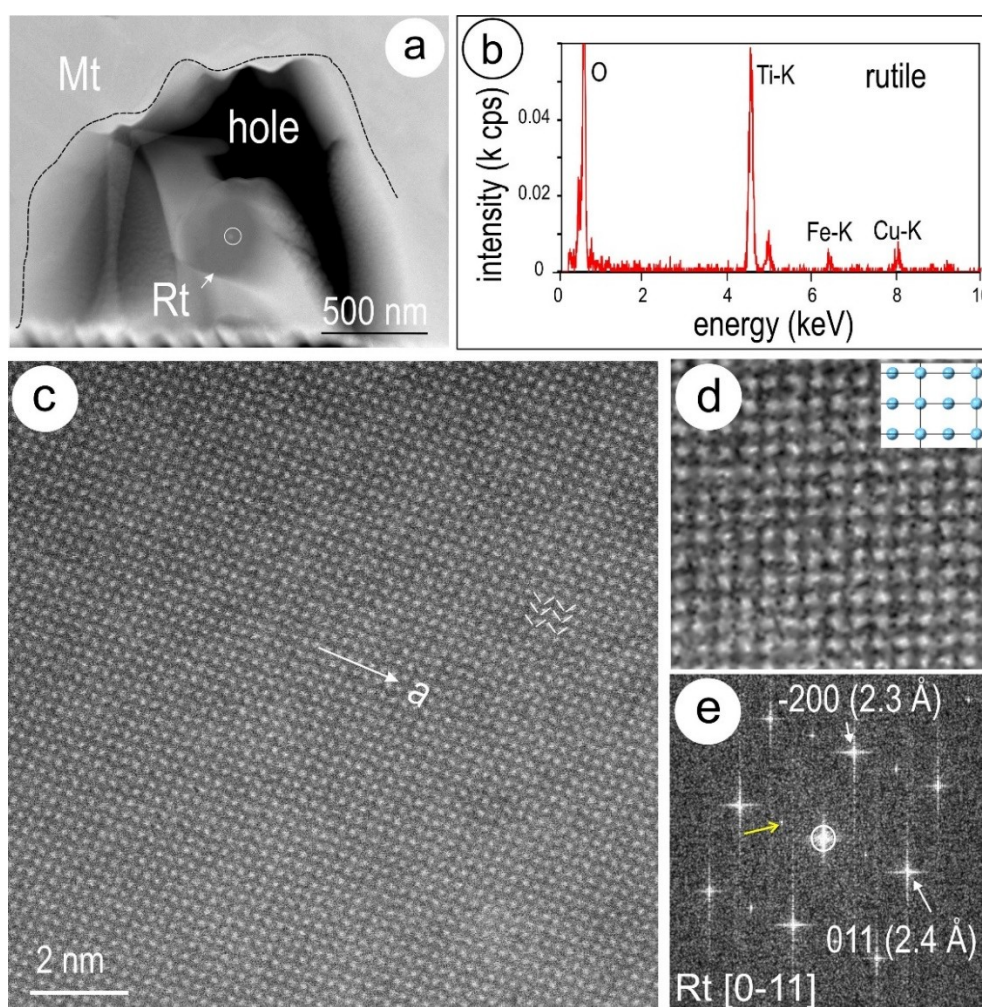

**Figure S5.** HAADF STEM images (a, c, d), spectrum (b) and FFT (e) showing rutile (Rt) on [0-11] zone axis (foil #4). Blue circles in the crystal structure model represent Ti atoms. Yellow arrow in (e) shows satellite reflections attributable to twinning along *a* axis, as marked by white lines in (c). Mt-magnetite. The hole is most likely produced during FIB milling.



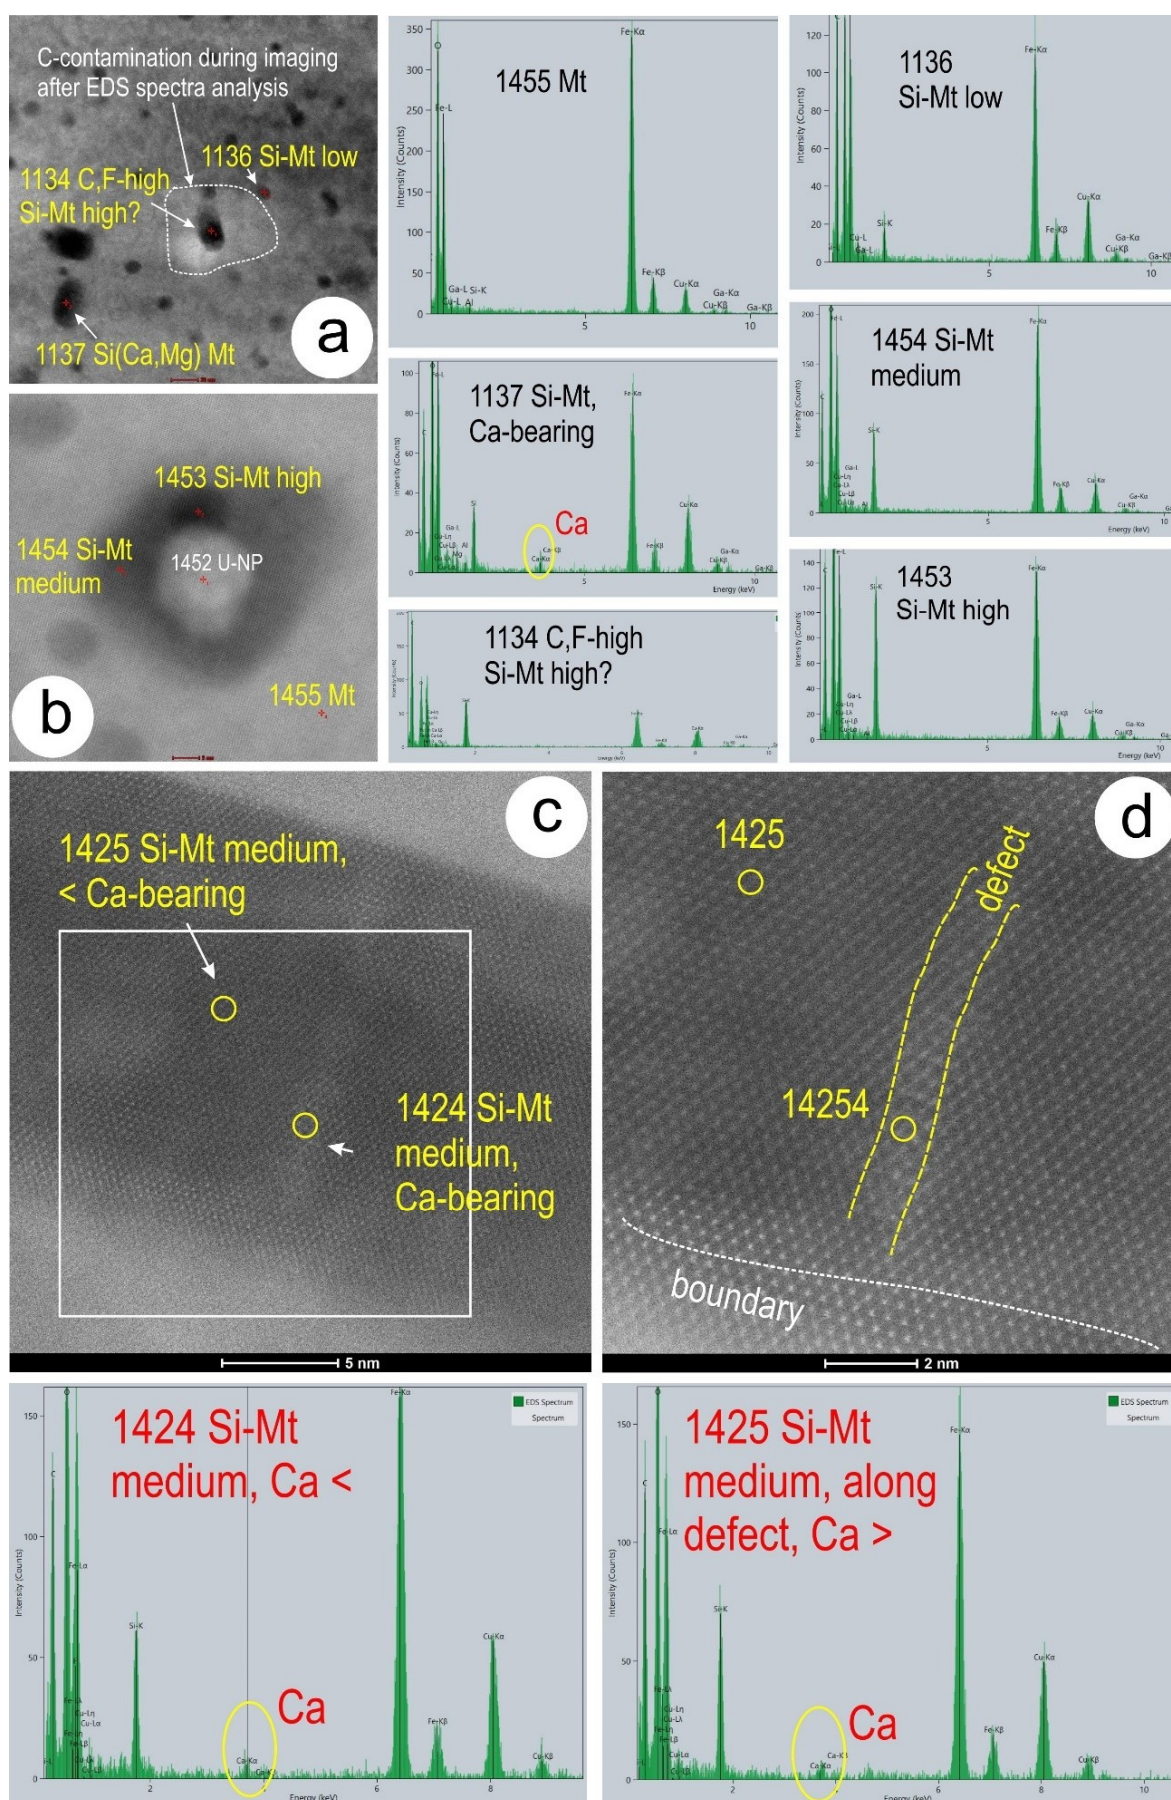

**Figure S6.** HAADF STEM images and EDS spectra showing variation in composition of Si-Fe-blebs (Si-Mt) from coarse magnetite (Mt) (foil #1).



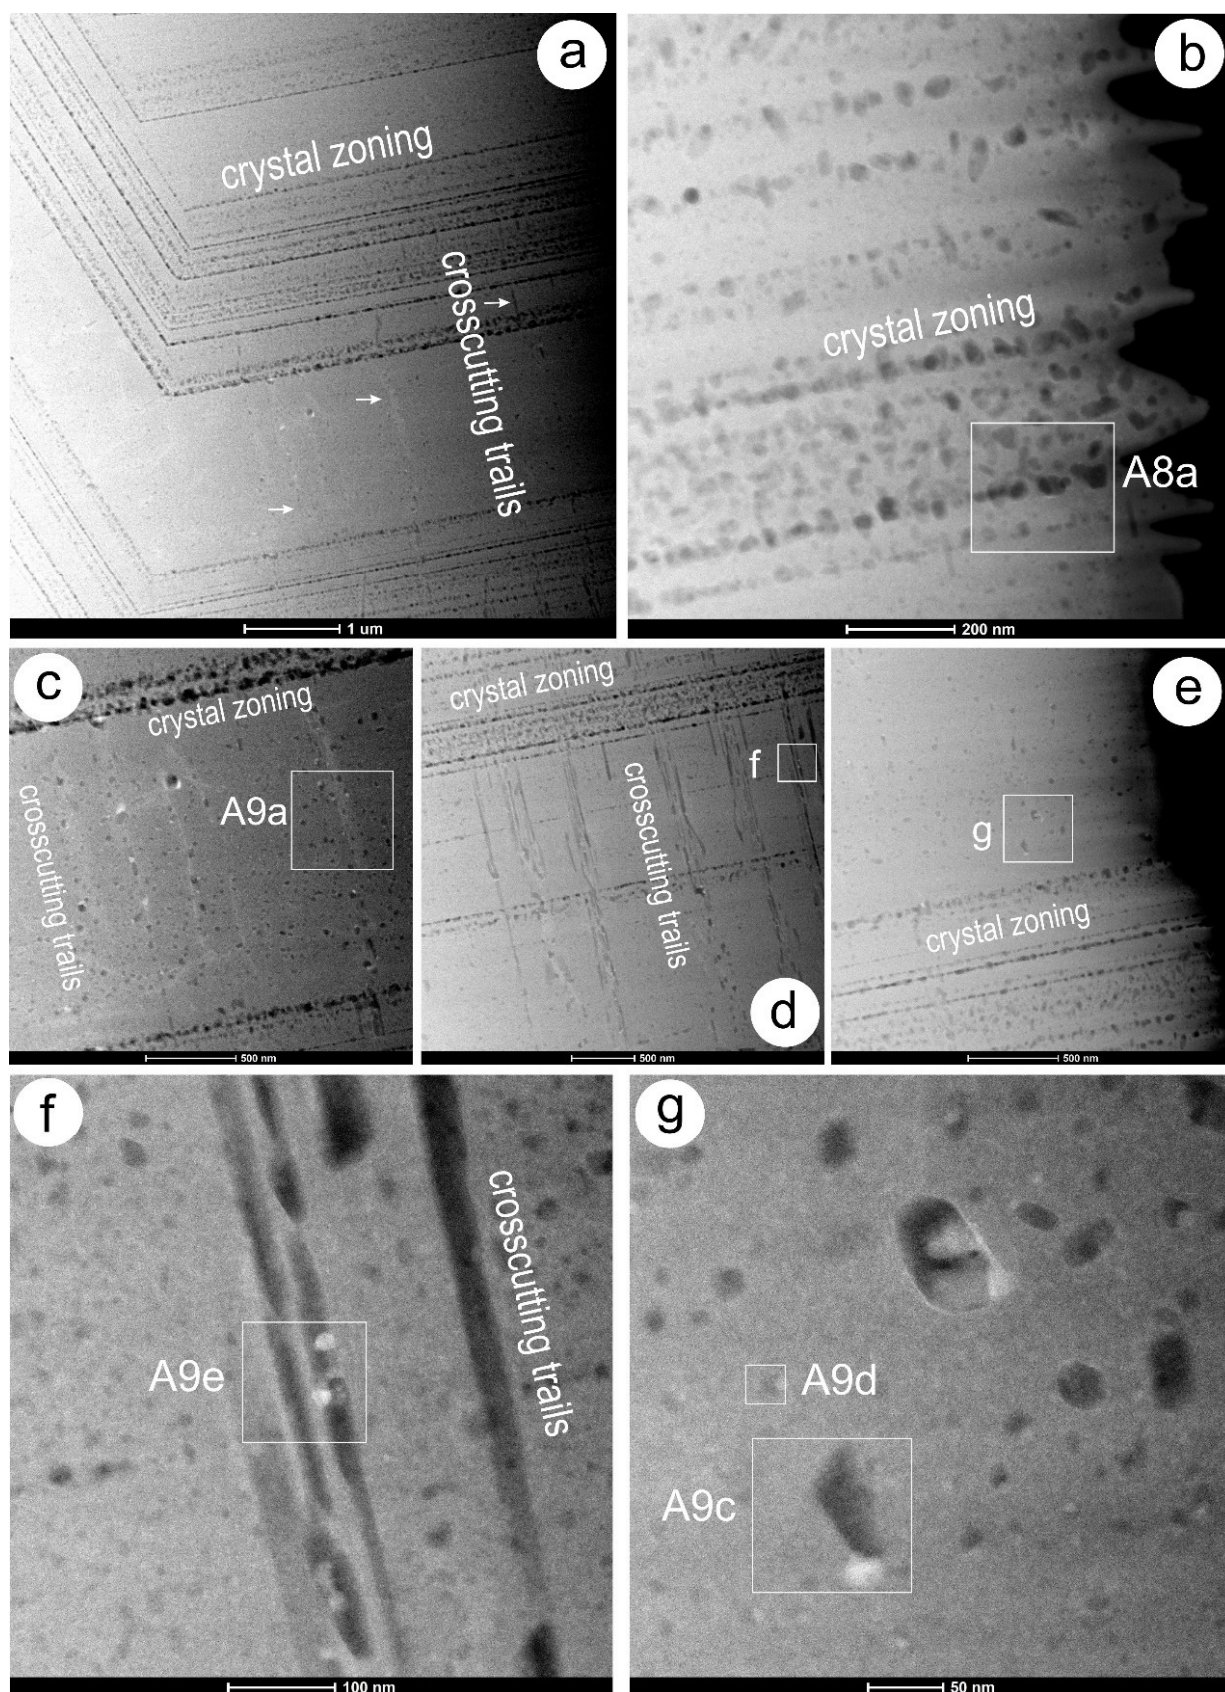

**Figure S7.** HAADF STEM images showing textures of silician magnetite of medium-sized grains (foil #2).



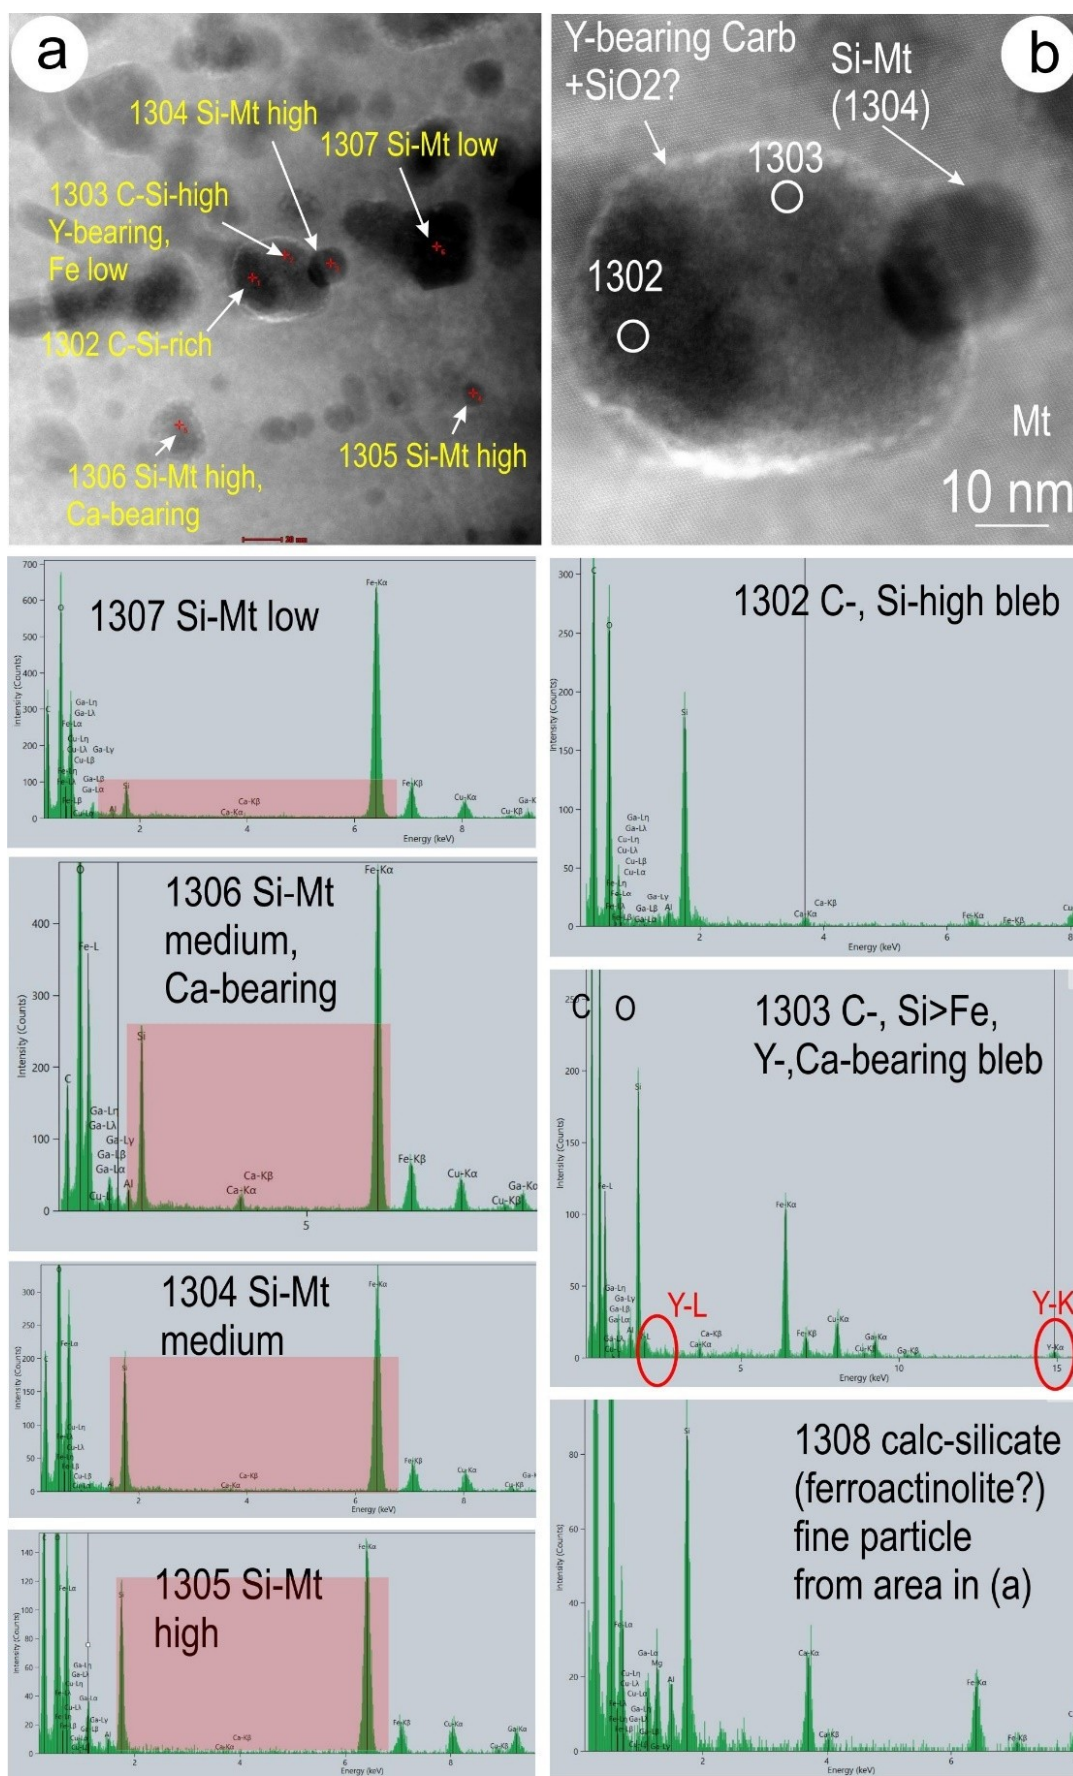

**Figure S8.** HAADF STEM images and EDS spectra showing variation in composition of Si-Fe-blebs (Si-Mt) along crystal zoning in medium-sized magnetite (Mt) (foil #2).

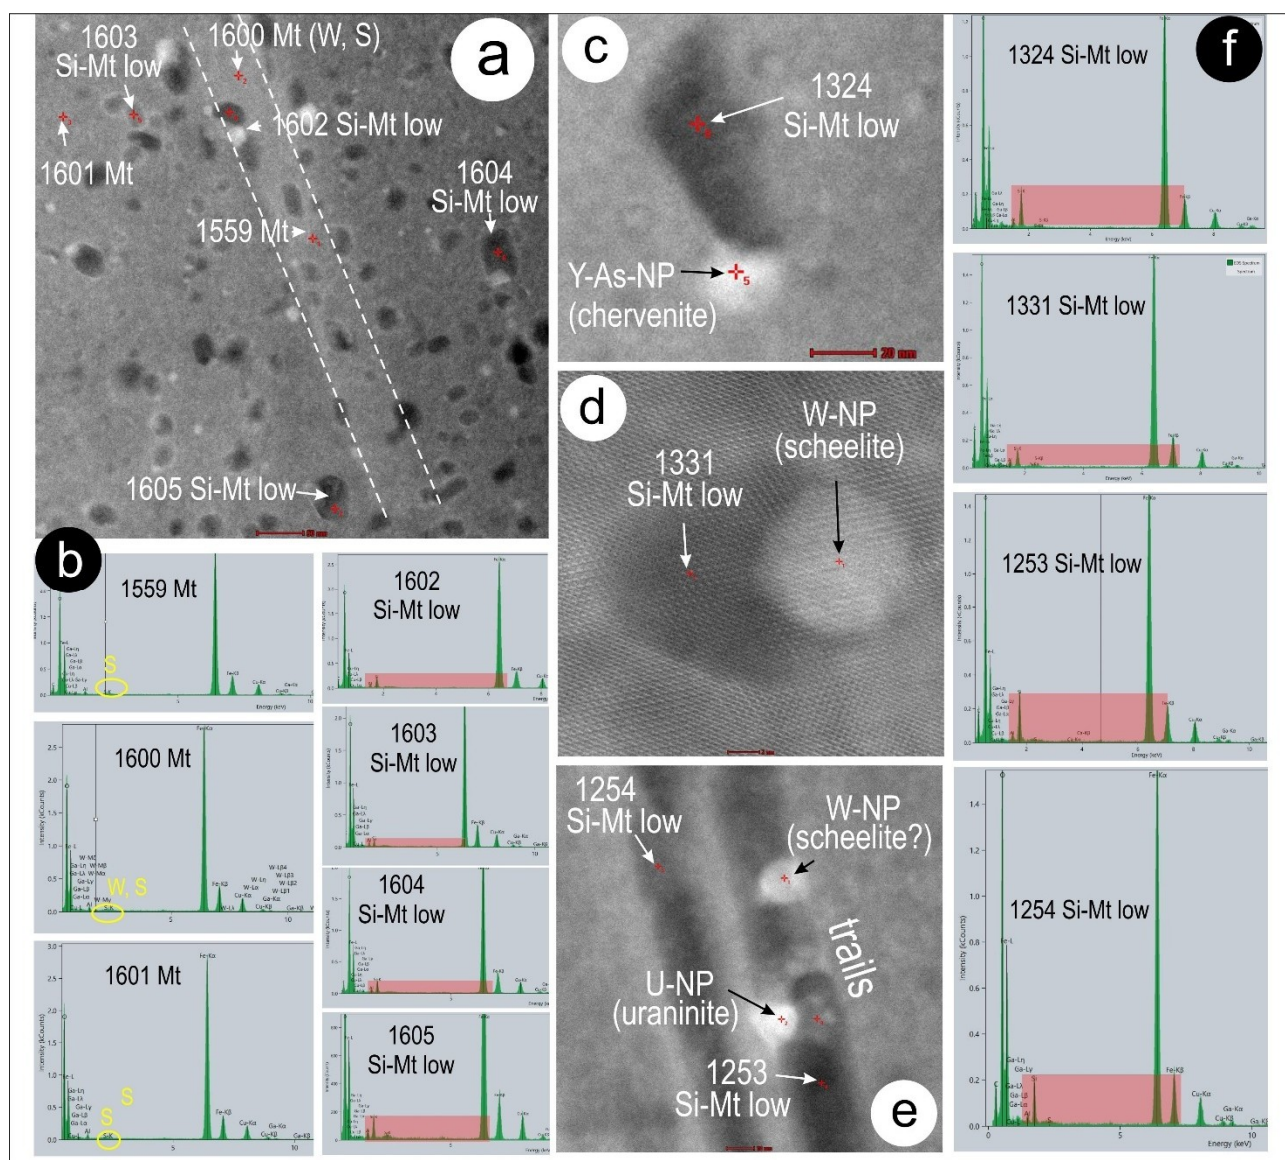

**Figure S9.** HAADF STEM images and EDS spectra showing variation in composition of Si-Fe-blebs (Si-Mt) along trails in medium-sized magnetite (Mt) (foil #2).
